# Supplementary material for: Stabilisation of copper(i) polypyridyl complexes toward aerobic oxidation by zinc(ii) in combination with acetate anions: a facile approach and its application in ascorbic acid sensing in aqueous solution
Source: Royal Society of Chemistry journal article supplement (doi:10.1039/c8dt03580f), 2018-12-13
Supplement: c8dt03580f1.pdf [file c8dt03580f1.pdf]

Electronic Supplementary Information

**Stabilisation of copper(I) polypyridyl complexes toward aerobic oxidation by zinc(II) in combination with acetate anions: a facile approach and application in ascorbic acid sensing in aqueous solution**

Pattira Suktanarak,<sup>a</sup> Vithaya Ruangpornvisuti,<sup>a</sup> Chomchai Suksai,<sup>b</sup> Thawatchai Tuntulani,<sup>a</sup>  
and Pantee Leeladee<sup>a,c,\*</sup>

<sup>a</sup> Department of Chemistry, Faculty of Science, Chulalongkorn University, Bangkok 10330, Thailand.

<sup>b</sup> Department of Chemistry and Centre for Innovation in Chemistry, Faculty of Science, Burapha University, Chonburi 20131, Thailand.

<sup>c</sup> Research Group on Materials for Clean Energy Production STAR, Department of Chemistry, Faculty of Science, Chulalongkorn University, Bangkok 10330, Thailand.

## Experimental Procedure

### Ligand synthesis

**2,2'-dipicolylamine (dpa).** The **dpa** ligand was prepared according to a published procedure.<sup>S1</sup> To the suspension of anhydrous MgSO<sub>4</sub> (2.78 g, 23.1 mmol) in CH<sub>2</sub>Cl<sub>2</sub> (3.80 mL) was added 2-pyridinecarboxaldehyde (0.50 g, 4.60 mmol) and 2-(aminomethyl)pyridine (0.50 g, 4.60 mmol). The mixture was stirred for 3 h at room temperature under N<sub>2</sub>. After that, the suspension was filtered, and solvent in the filtrate was removed under vacuum to obtain a yellow-oil product. The product was redissolved in CH<sub>3</sub>CN (12 mL) and cooled to -5°C for 15 min. The NaBH<sub>4</sub> was slowly added in the solution and stirred for 18 h at room temperature. The reaction was quenched with conc. HCl (7.70 mL) and heated at 60°C for 2 h to give the white precipitates in yellow solution. The white solid was filtered out, and solvent in the filtrate was removed under vacuum. The crude product was redissolved in H<sub>2</sub>O. To the aqueous solution was added NaOH pellets (3.30 g, 82.5 mmol) and the mixture was stirred for 15 min. The solution was extracted with diethyl ether (3 x 200 mL) and dried under vacuum to obtain the yellow oil product. Yield: 80 %. <sup>1</sup>H-NMR (400 MHz, CDCl<sub>3</sub>, ppm): δ 8.49 (m, 2H, ArH), 7.50 (m, 2H, ArH), 7.23 (d, 2H, *J* = 8.0 Hz, ArH), 7.01 (m, 2H, ArH), 3.84 (s, 4H, -CH<sub>2</sub>-).

**2-[bis(2-pyridylmethyl)aminomethyl]nitrobenzene.** This ligand was prepared by following a modified published procedure.<sup>S2</sup> The mixture solution of **dpa** (3.86 g, 19.37 mmol), 2-nitrobenzylbromide (4.19 g, 19.40 mmol) and molecular sieve (5 g) was prepared in CH<sub>3</sub>CN (80 mL). The reaction was stirred at room temperature under N<sub>2</sub> for 16 h. The suspension was filtered, and the organic solvent was evaporated. Then, the crude product was redissolved in CH<sub>2</sub>Cl<sub>2</sub> and washed with H<sub>2</sub>O (3 x 300 ml). The organic layer was dried with anhydrous NaSO<sub>4</sub>, and the solvent was removed to obtain a dark-brown oil. Yield: 80 %. <sup>1</sup>H-NMR (400 MHz, CDCl<sub>3</sub>, ppm): δ 8.49 (d, 2H, *J* = 4.4 Hz, ArH), 7.75 (m, 1H, ArH), 7.70 (dd, 1H, *J* = 0.5, 7.5 Hz, ArH), 7.64 (td, 2H, *J* = 6 Hz, ArH), 7.49 (t, 1H, *J* = 7.2 Hz, ArH), 7.39 (d, 2H, *J* = 7.6 Hz, ArH), 7.33 (t, 1H, *J* = 7.6 Hz, ArH), 7.13 (m, 2H, ArH), 4.07 (s, 2H, -CH<sub>2</sub>-), 3.79 (s, 4H, -CH<sub>2</sub>-).

**2-[bis(2-pyridylmethyl)aminomethyl]aniline (tpa).** The **tpa** was prepared following a modified published procedure.<sup>S2</sup> Into a 2-[bis(2-pyridylmethyl)aminomethyl]nitrobenzene (3 g, 8.97 mmol) in two-neck round bottom flask, Pd-C (0.3 g) and MeOH (150 ml) were added and stirred under H<sub>2</sub> for 24 h. The mixture was filtered through celite and the solvent was removed under reduced pressure. Yield: 98%, red brown oil. <sup>1</sup>H-NMR (400 MHz, CDCl<sub>3</sub>, ppm): δ 8.56 (m, 2H, ArH), 7.62 (m, 2H, ArH), 7.36 (d, 2H, *J* = 7.2 Hz, ArH), 7.16 (m, 2H, ArH), 7.07 (m, 2H, ArH), 6.63 (t, 2H, *J* = 6.0 Hz, ArH), 3.82 (s, 4H, -CH<sub>2</sub>-), 3.71 (s, 2H, -CH<sub>2</sub>-).

**9-[(2,2'-dipicolylamino)methyl]anthracene (adpa).** The ligand **adpa** was synthesized according to a published method.<sup>S3</sup> The stirred solution of 9-bis(chloromethyl)anthracene (1.00 g, 4.40 mmol), 2,2'-dipicolylamine (1.05 g, 5.20 mmol) and K<sub>2</sub>CO<sub>3</sub> (2.43 g, 1.70 mmol) in anhydrous DMF (6.8 mL) was slowly added a solution of KI (0.73 g, 4.40 mmol) in DMF (3.6 mL). The reaction was stirred at room temperature over 1 h. To the reaction was added 1M HCl, and the solution was washed with EtOAc (3X). Then, the aqueous solution was alkalinized with 4 M NaOH and extracted by EtOAc : THF (1 : 1).

The organic layer was washed with H<sub>2</sub>O and brine solution. The solution was dried over anhydrous MgSO<sub>4</sub>, and the solvent was removed under reduced pressure. The product was obtained after crystallization in MeOH : ether. Yield: 27%, a pale yellow solid. <sup>1</sup>H-NMR (400 MHz, CDCl<sub>3</sub>, ppm): δ 8.49 (d, 2H, *J* = 4.0 Hz, *ArH*), 8.39 (s, 1H, *ArH*), 8.37 (d, 2H, *J* = 4.8 Hz, *ArH*), 7.95 (m, 2H, *ArH*), 7.57 (ddd, 2H, *J* = 1.6, 7.6, 7.6 Hz, *ArH*), 7.41-7.47 (m, 4H, *ArH*), 7.31 (d, 2H, *J* = 7.6 Hz, *ArH*), 7.11 (dd, 2H, *J* = 4.8, 6.0 Hz, *ArH*), 4.67 (s, 2H, -CH<sub>2</sub>-), 3.88 (s, 4H, -CH<sub>2</sub>-).

**N-(anthracene-9-yl methyl)-2-(((pyridin-2-ylmethyl)(pyridin-3-yl methyl)amino)methyl)aniline (atpa)**. The ligand **atpa** was synthesized following a reported procedure.<sup>S4</sup> **atpa** was prepared from reaction of **tpa** (1.50 g, 4.92 mmol) and anthracene-9-carbaldehyde (1.02 g, 4.95 mmol). The mixture solution of **tpa** and anthracene-9-carbaldehyde in CH<sub>3</sub>CN (106 mL) was refluxed under N<sub>2</sub> atmosphere for 24 h. The mixture was evaporated under reduced pressure to obtain the imine product. After that, the imine was reduced by NaBH<sub>4</sub> (0.68 g) in MeOH at low temperature and further refluxed for 16 h. H<sub>2</sub>O was added into the solution, and then the MeOH was removed under reduced pressure. The aqueous solution was extracted with CH<sub>2</sub>Cl<sub>2</sub> and evaporated. The crude product was purified by column chromatography and then recrystallized in MeOH : ether (1 : 3). Yield: 20%, a yellow solid. <sup>1</sup>H-NMR (400 MHz, CDCl<sub>3</sub>, ppm): δ 8.59 (s, 1H, *ArH*), 8.20 (dd, 4H, *J* = 49.6, 8.8 Hz, *ArH*), 8.02 (d, 2H, *J* = 7.2 Hz, *ArH*), 7.51 (dt, 4H, *J* = 33.6, 7.6 Hz, *ArH*), 7.34 (t, 1H, *J* = 7.6 Hz, *ArH*), 7.08 (dd, 2H, *J* = 43.0, 7.8 Hz, *ArH*), 6.73 (m, 3H, *ArH*), 6.59 (td, 2H, *J* = 7.6, 1.6 Hz, *ArH*), 6.41 (d, 2H, *J* = 7.6 Hz, *ArH*), 6.07 (bs, 1H, *NH*), 5.12 (d, 2H, *J* = 4.0 Hz, -CH<sub>2</sub>-), 3.54 (s, 2H, -CH<sub>2</sub>-), 3.48 (s, 4H, -CH<sub>2</sub>-).

### Synthesis of copper complexes

**Cu<sup>II</sup>(adpa)** was synthesized according to a published procedure.<sup>S5</sup> To a solution of **adpa** (0.15 g, 0.39 mmol) in MeOH (3 mL) was added Cu(ClO<sub>4</sub>)<sub>2</sub> (0.16 g, 0.43 mmol) dissolved in MeOH (3 mL). After stirred for 2h, diethyl ether was added into the solution to crystallize the green solid of Cu<sup>II</sup>(**adpa**). (61 % yield). Anal. Calcd (found) of C<sub>27</sub>H<sub>25</sub>Cl<sub>2</sub>CuN<sub>3</sub>O<sub>9</sub>: %C = 48.40 (48.09), %H = 3.76 (3.74), %N = 6.27 (6.32). ESI-MS (*m/z*) of [Cu(**adpa**)+(ClO<sub>4</sub>)]<sup>+</sup> for calculated: 551.07; found: 551.0676.

**Cu<sup>II</sup>(atpa)** was synthesized from **atpa** and Cu(ClO<sub>4</sub>)<sub>2</sub>. To a stirred solution of **atpa** (0.10 g, 0.20 mmol) in CH<sub>2</sub>Cl<sub>2</sub>, Cu(ClO<sub>4</sub>)<sub>2</sub> (0.11 g, 0.30 mmol) in MeOH was added. The reaction was stirred for 2 h to obtain the blue-green solid of Cu<sup>II</sup>(**atpa**). Next, the solid was filtered and washed with CH<sub>2</sub>Cl<sub>2</sub> and MeOH. (85 % yield). Anal. Calcd (found) of C<sub>34</sub>H<sub>32</sub>Cl<sub>2</sub>CuN<sub>4</sub>O<sub>9</sub>: %C = 52.69 (52.63), %H = 4.16 (4.12), %N = 7.23 (7.14). ESI-MS (*m/z*) of Cu(**atpa**), [Cu(**atpa**)+(ClO<sub>4</sub>)]<sup>+</sup> for calculated: 656.13; found: 656.0957.

### References

- (S1) C. Incarvito, M. Lam, B. Rhatigan, A. L. Rheingold, C. J. Qin, A. L. Gavrilova and B. Bosnich, *J. Chem. Soc., Dalton Trans.*, 2001, 3478-3488.
- (S2) S. C. Burdette, C. J. Frederickson, W. Bu and S. J. Lippard, *J. Am. Chem. Soc.*, 2003, **125**, 1778-1787.
- (S3) A. Ojida, Y. Mito-oka, M.-a. Inoue and I. Hamachi, *J. Am. Chem. Soc.*, 2002, **124**, 6256-6258.
- (S4) U. Khamjumphol, S. Watchasit, C. Suksai, W. Janrungratsakul, S. Boonchiangma, T. Tuntulani and W. Ngeontae, *Anal. Chim. Acta*, 2011, **704**, 73-86.
- (S5) B. Antonioli, B. Buchner, J. K. Clegg, K. Gloe, K. Gloe, L. Gotzke, A. Heine, A. Jager, K. A. Jolliffe, O. Kataeva, V. Kataev, R. Klingeler, T. Krause, L. F. Lindoy, A. Popa, W. Seichter and M. Wenzel, *Dalton Trans.*, 2009, 4795-4805.

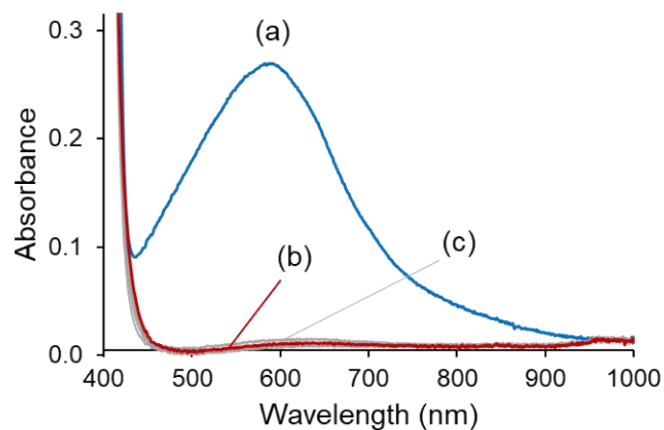

**Fig. S1** UV-vis spectra of (a)  $\text{Cu}^{\text{II}}(\text{adpa})$  (2.0 mM) in  $\text{CH}_3\text{CN}$ ; (b)  $\text{Cu}^{\text{II}}(\text{adpa})$  upon addition of  $\text{AsH}_2$  (0.55 mol equiv.) and (c) b after purging  $\text{O}_2$  1-5 h

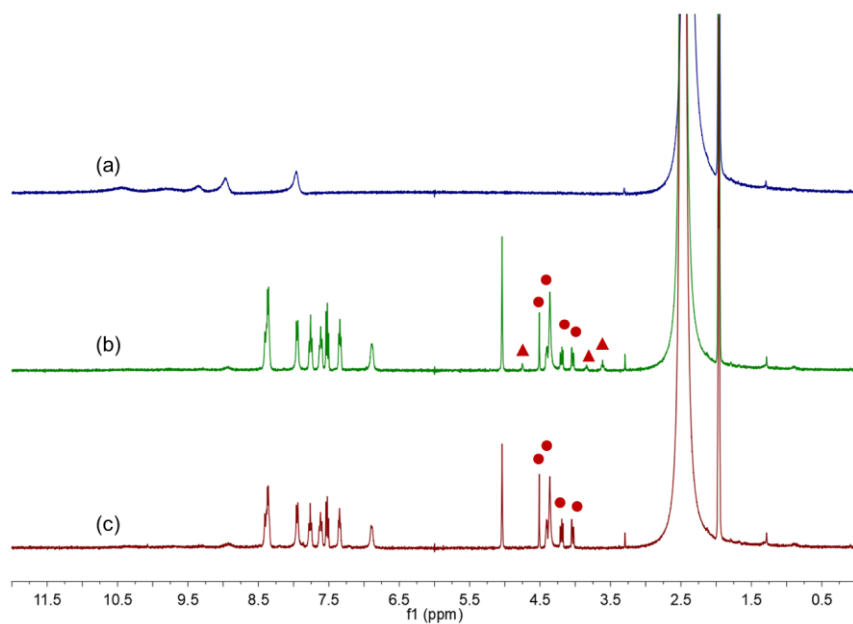

**Fig. S2**  $^1\text{H-NMR}$  spectra of (a) 10 mM  $\text{Cu}^{\text{II}}(\text{adpa})$  in  $\text{CD}_3\text{CN}$ ; (b) a +  $\text{AsH}_2$  (0.55 mol equiv.) in 15%  $\text{D}_2\text{O}/\text{CD}_3\text{CN}$ ; and (c) b exposed to air for 1 h at room temperature.  $^1\text{H-NMR}$  signals ( $\blacktriangle$ ) belong to  $\text{AsH}_2$ , whereas ( $\bullet$ ) correspond to a bicyclic form of dehydroascorbic acid (oxidized form of ascorbic acid)

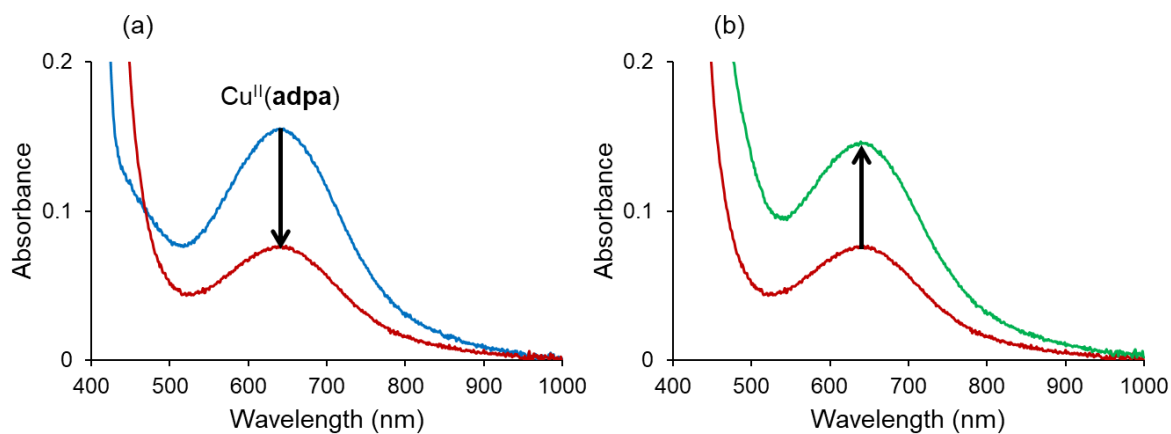

**Fig. S3** Monitoring *d-d* band of  $\text{Cu}^{\text{II}}(\text{adpa})$  in  $\text{H}_2\text{O}/\text{CH}_3\text{CN}$  (7:3 v/v) at (a) 2 min; and (b) 2 h after addition of  $\text{AsH}_2$  (1.0 mol equiv.) in air

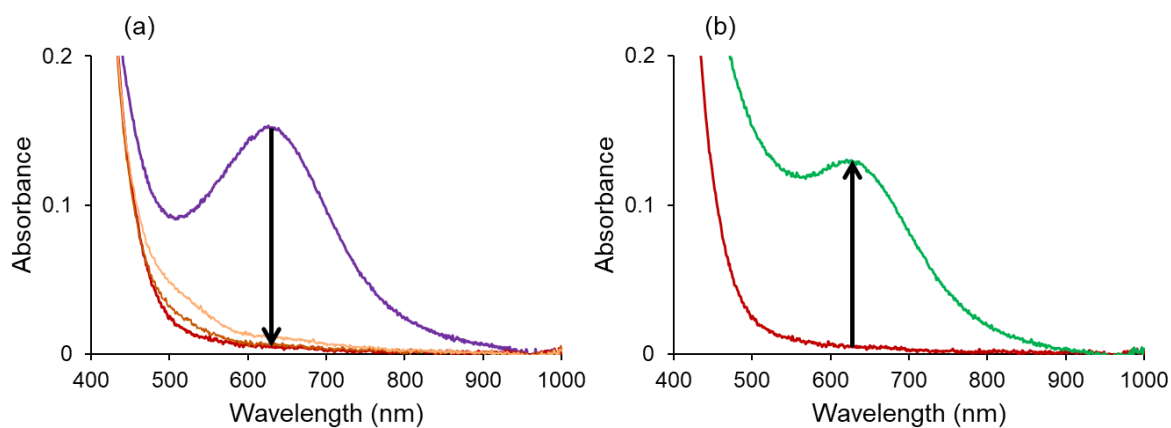

**Fig. S4** (a) Monitoring the reaction of  $\text{Cu}^{\text{II}}(\text{adpa})$  and  $\text{AsH}_2$  in the presence of  $\text{Zn}(\text{OAc})_2$  in aqueous solution: 2 min (—), 30 min (—) and 60 min (—) after  $\text{AsH}_2$  addition; (b) Regeneration of  $\text{Cu}^{\text{II}}(\text{adpa})$  after exposed to air for 4 h (—)

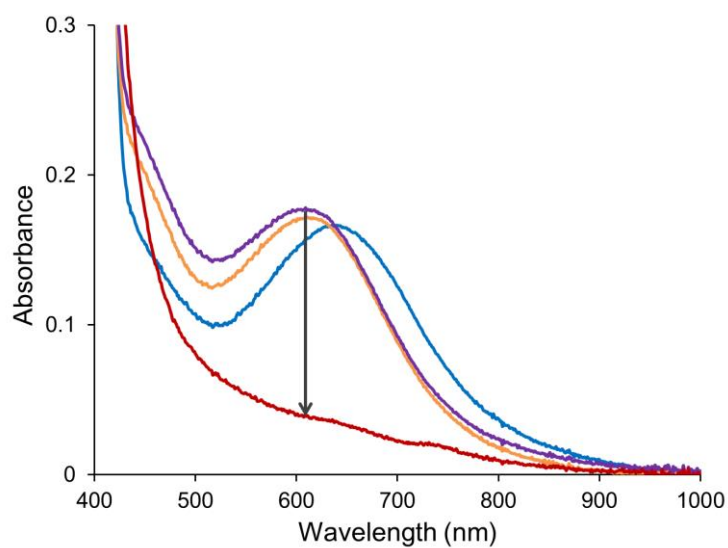

**Fig. S5** UV-vis spectra of Cu<sup>II</sup>(adpa) (—) in the presence of imidazole (—) and Zn(NO<sub>3</sub>)<sub>2</sub> (—) upon addition of AsH<sub>2</sub> 1 mol equiv. (—)

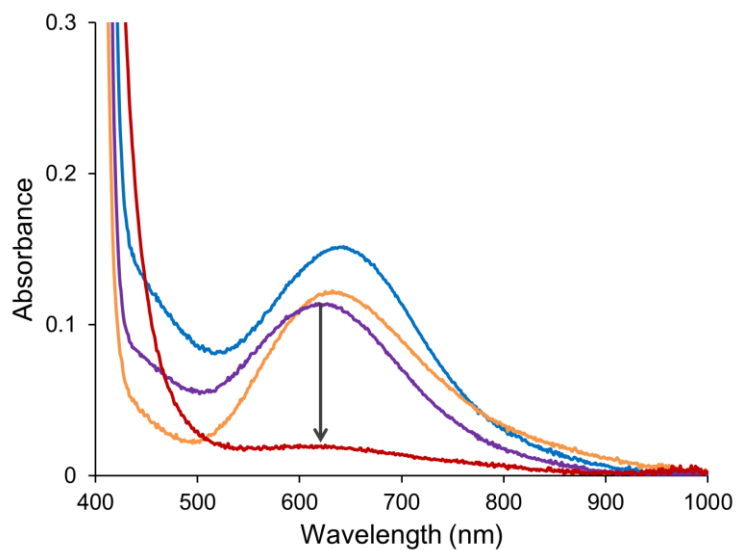

**Fig. S6** UV-vis spectra of Cu<sup>II</sup>(adpa) (—) in the presence of histidine (—) and Zn(NO<sub>3</sub>)<sub>2</sub> (—) upon addition of AsH<sub>2</sub> 1 mol equiv. (—)

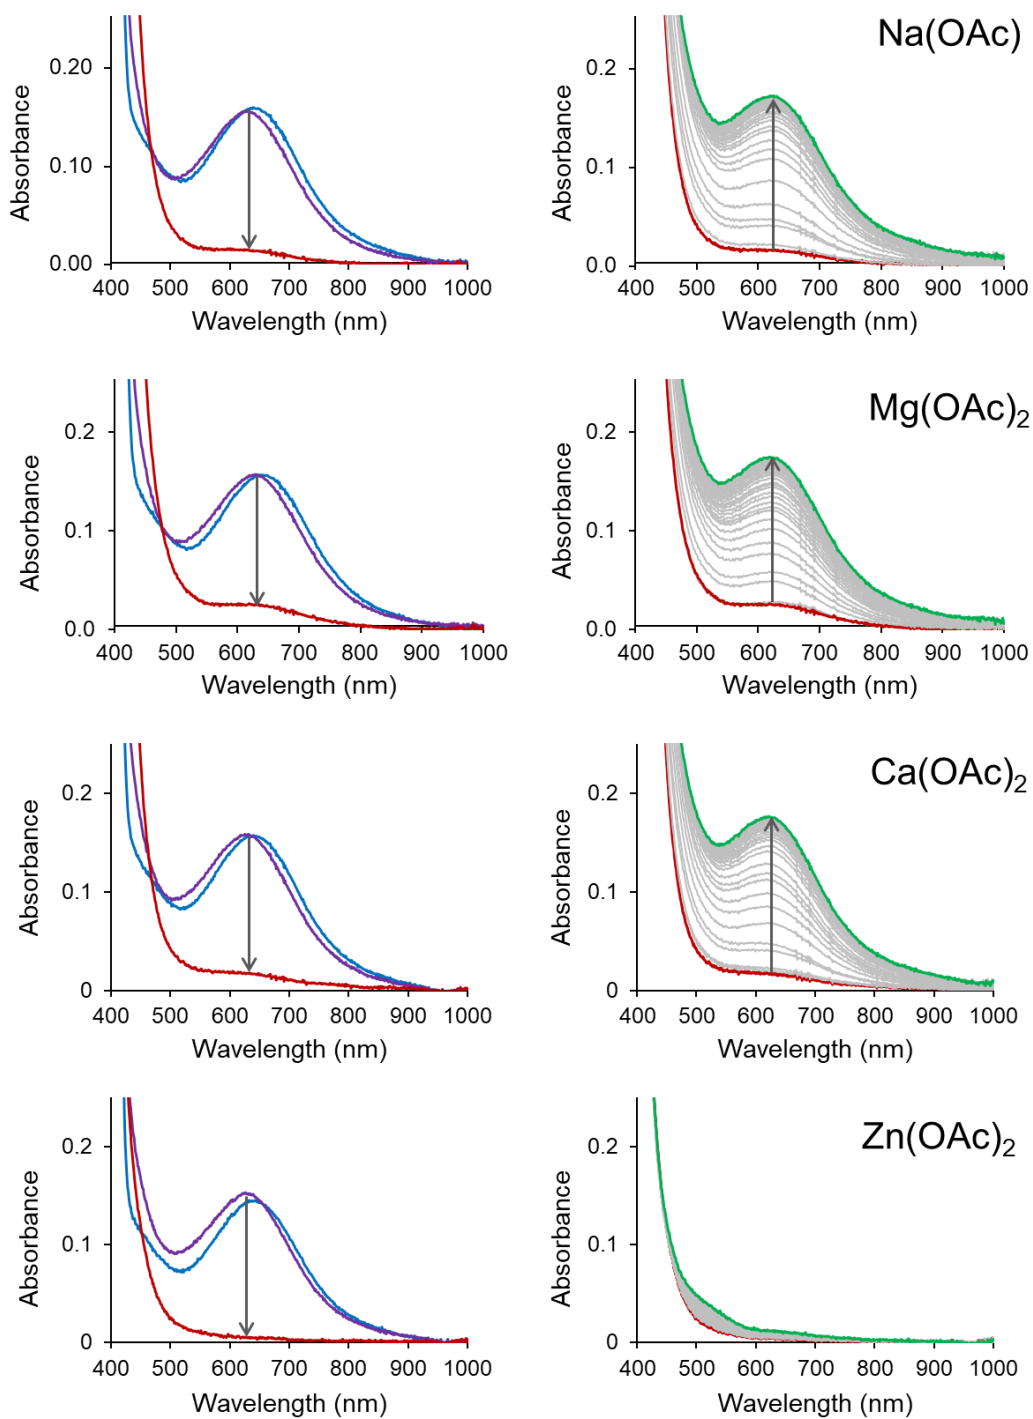

**Fig. S7** UV-Vis spectral change for reaction of  $\text{Cu}^{\text{II}}(\text{adpa})$  and  $\text{AsH}_2$  (1.0 equiv) in the presence of  $\text{Na}(\text{OAc})$ ,  $\text{Mg}(\text{OAc})_2$ ,  $\text{Ca}(\text{OAc})_2$  and  $\text{Zn}(\text{OAc})_2$  in  $\text{H}_2\text{O}/\text{CH}_3\text{CN}$  (7:3 v/v) under aerobic condition. The coloured line corresponds to species as follows;  $\text{Cu}^{\text{II}}(\text{adpa})$  (—),  $\text{Cu}^{\text{II}}(\text{adpa})+\text{M}(\text{OAc})_n$  (—),  $\text{Cu}^{\text{II}}(\text{adpa})+\text{M}(\text{OAc})_n+\text{AsH}_2$  under aerobic condition at 2 min (—), between 2-60 min (—) and 60 min (—)



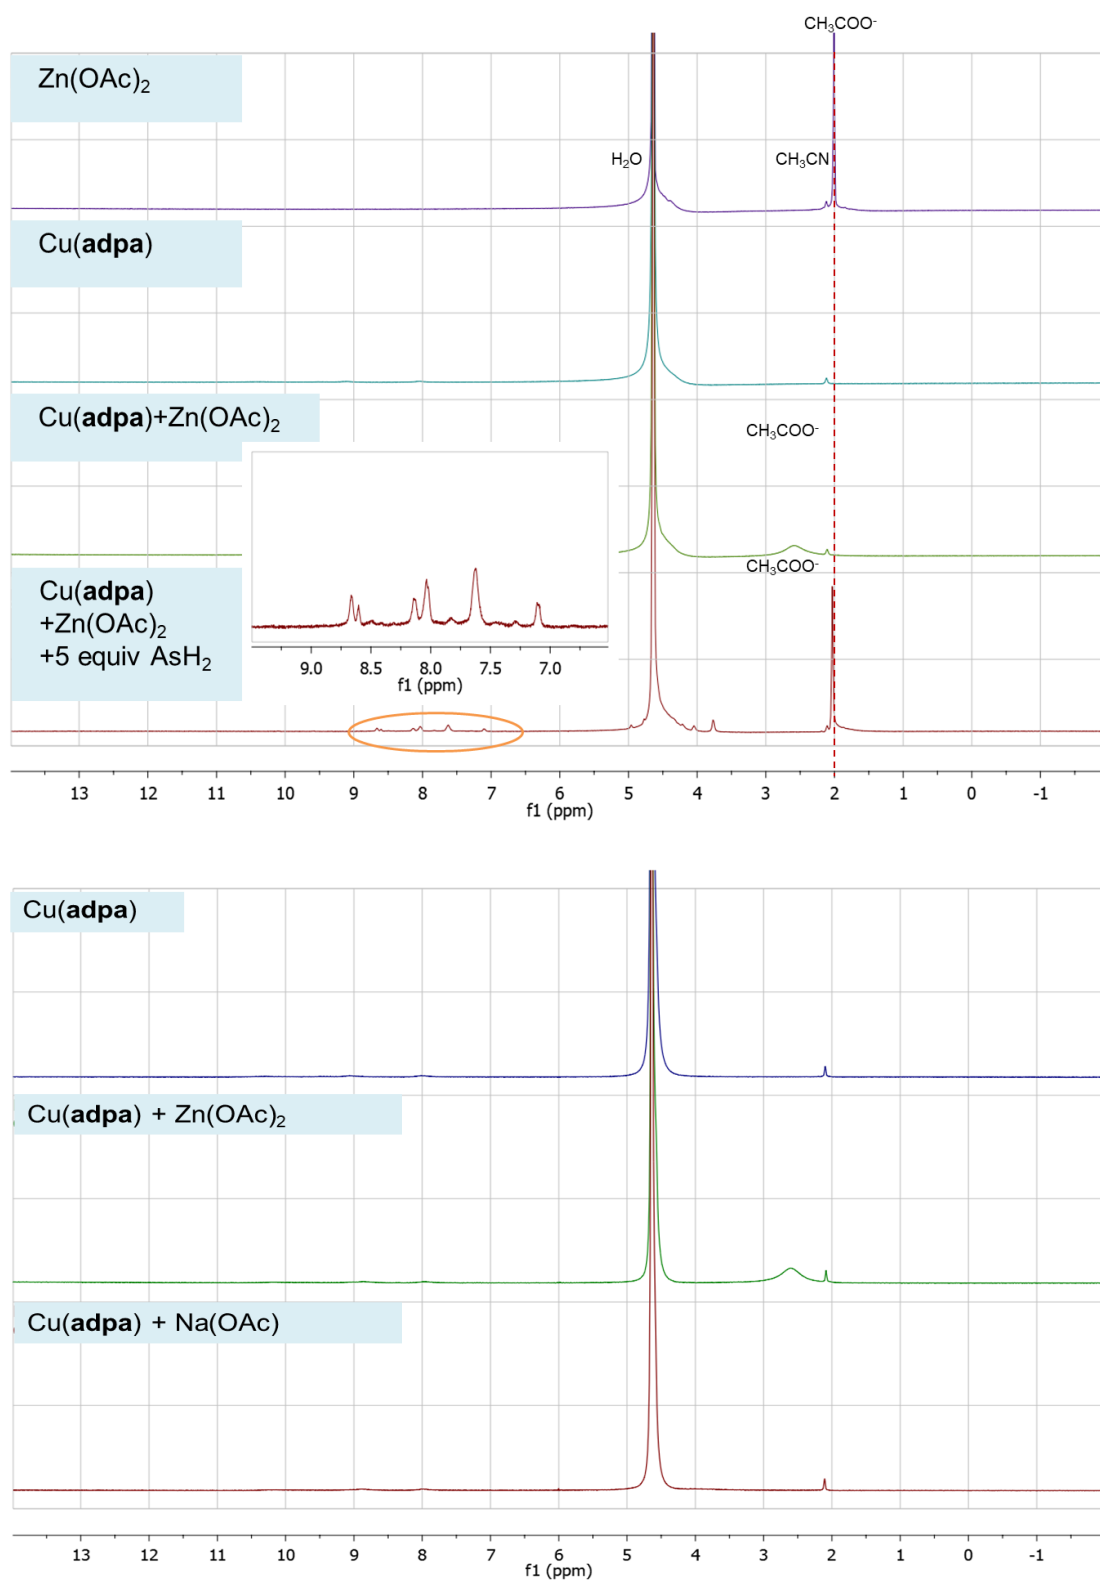

**Fig. S8** Comparison of  $^1\text{H-NMR}$  signals corresponding to acetate anions in various conditions

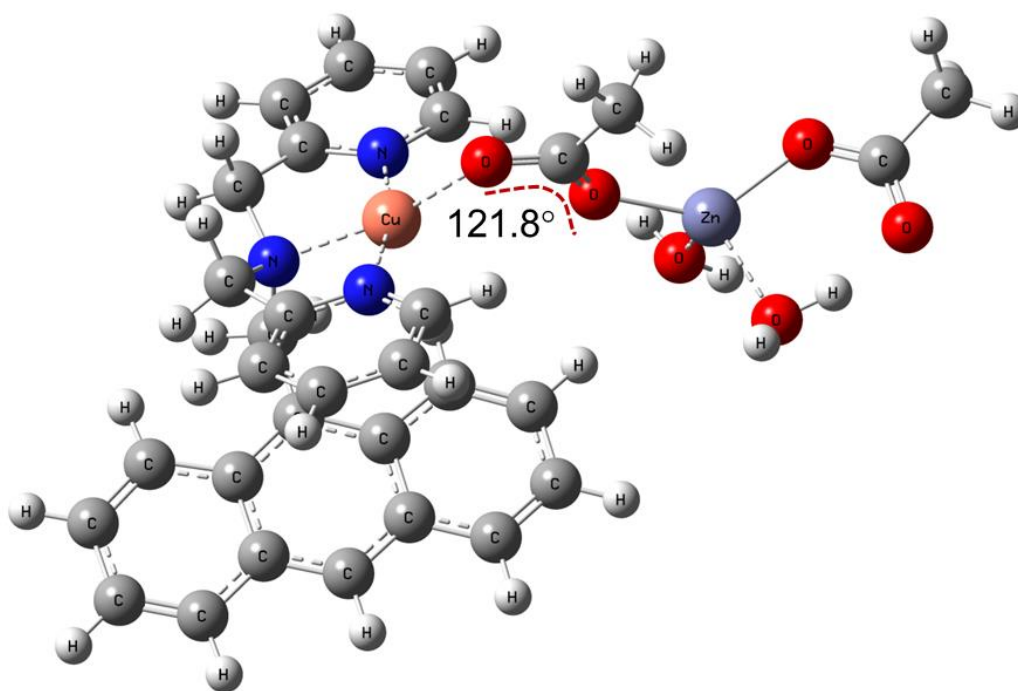

**Fig. S9** The CPCM(UFF)/B3LYP/6-311+G(d,p)-optimised structure of  $\text{Cu}^{\text{II}}(\text{adpa})/\text{Zn}(\text{OAc})_2(\text{H}_2\text{O})_2$  complex.

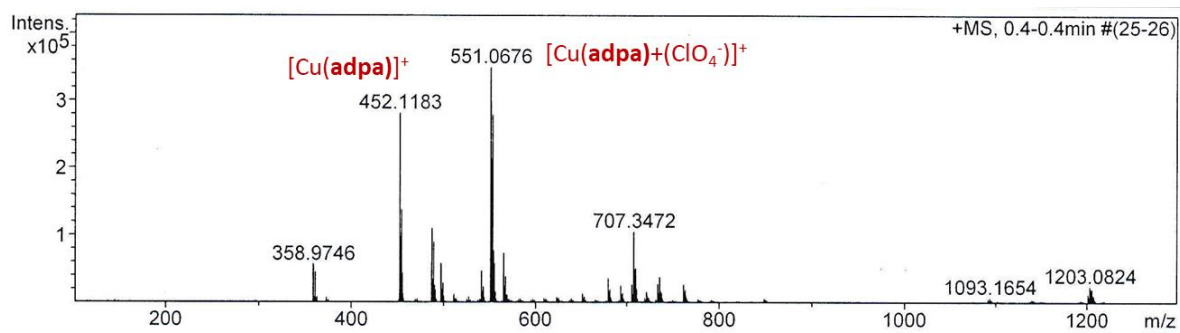

**Fig. S10** ESI-MS spectrum of  $\text{Cu}^{\text{II}}(\text{adpa})$  in  $\text{H}_2\text{O}/\text{CH}_3\text{CN}$  (7:3 v/v).

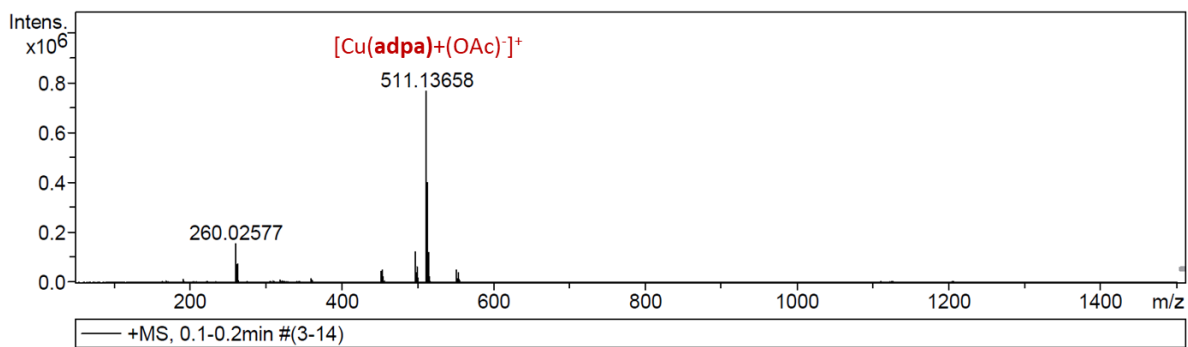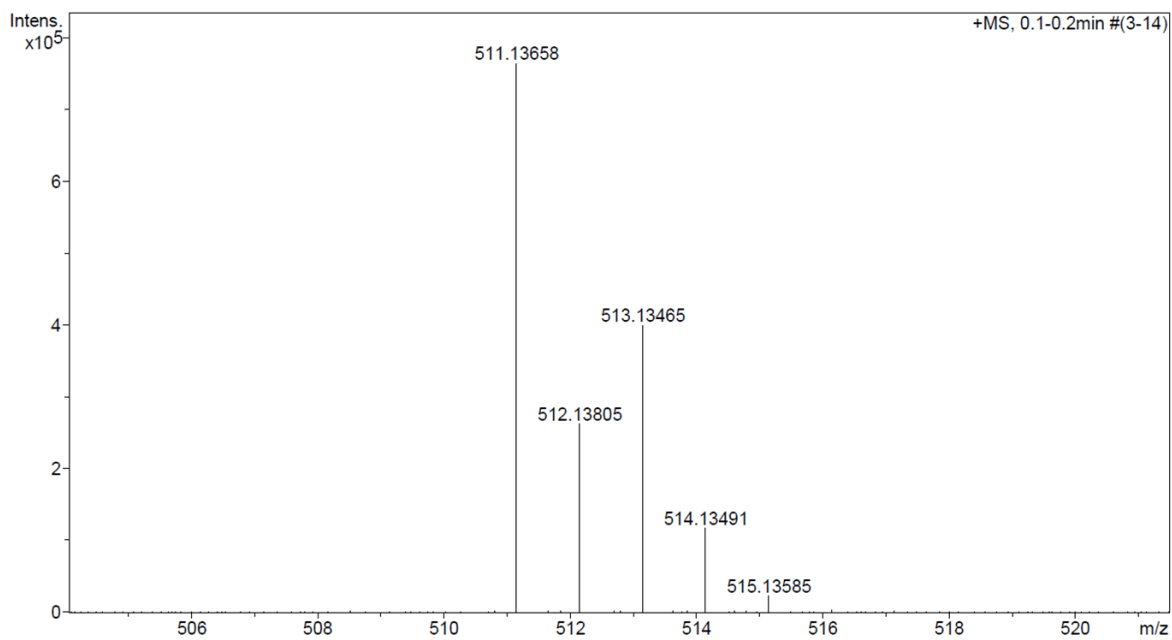

**Fig. S11** ESI-MS spectrum of  $\text{Cu}^{\text{II}}(\text{adpa})$  in the presence of  $\text{Zn}(\text{OAc})_2$  in  $\text{H}_2\text{O}/\text{CH}_3\text{CN}$  (7:3 v/v).

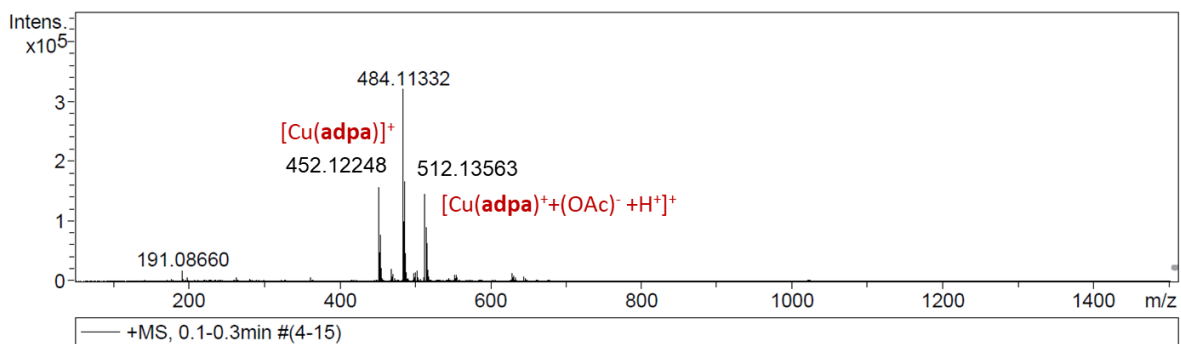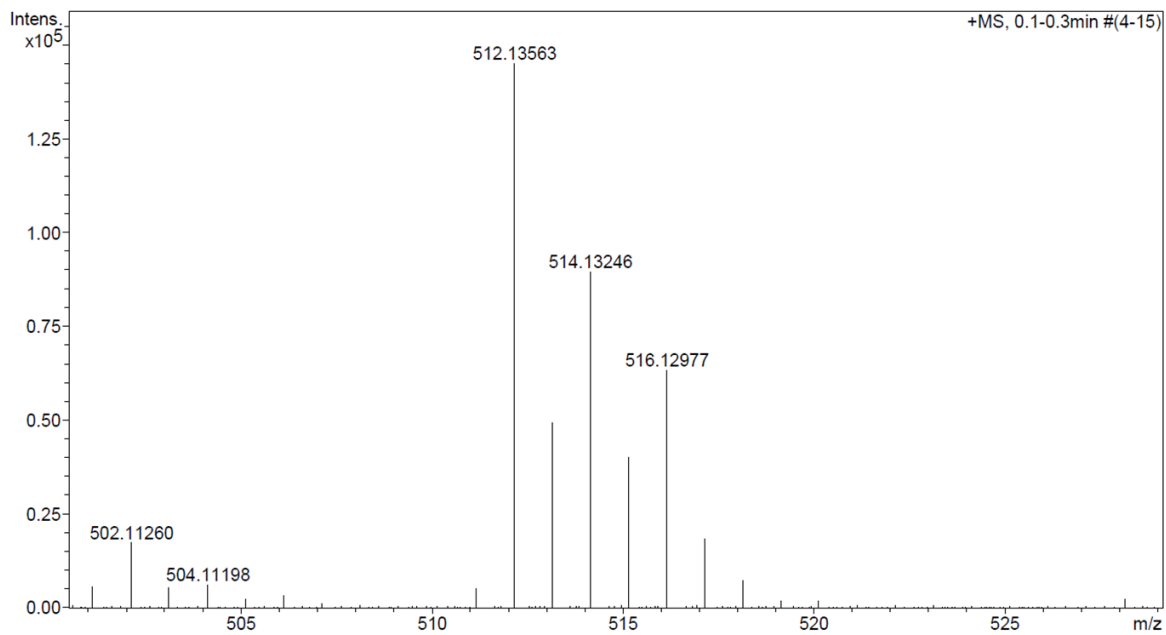

**Fig. S12** ESI-MS spectrum of the reaction of  $\text{Cu}^{\text{II}}(\text{adpa}) + \text{Zn}(\text{OAc})_2 + \text{AsH}_2$  (5 mol equiv.)  $\text{H}_2\text{O}/\text{CH}_3\text{CN}$  (7:3 v/v).

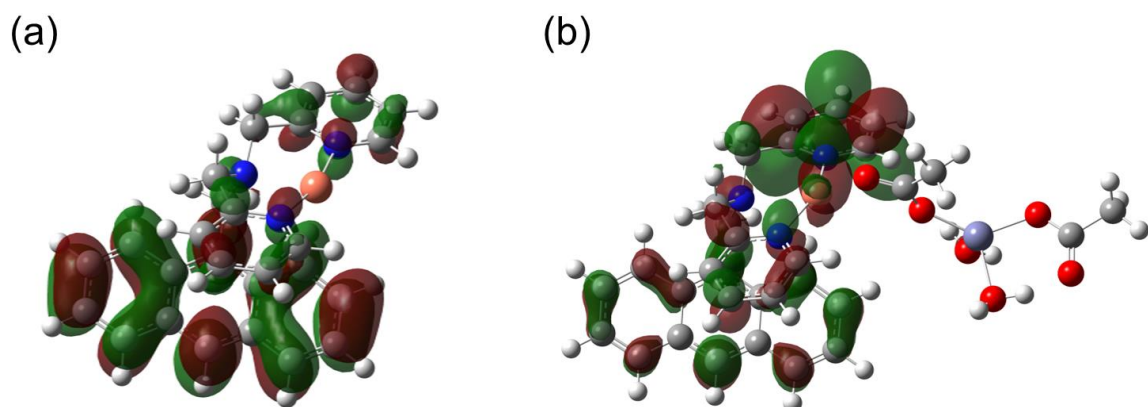

**Fig. S13** LUMOs plots of (a)  $\text{Cu}^{\text{I}}(\text{adpa})$  and (b)  $\text{Cu}^{\text{I}}(\text{adpa})/\text{Zn}(\text{OAc})_2(\text{H}_2\text{O})_2$ , computed at the CPCM(UFF)/B3LYP/6-311+G(d,p) level of theory.

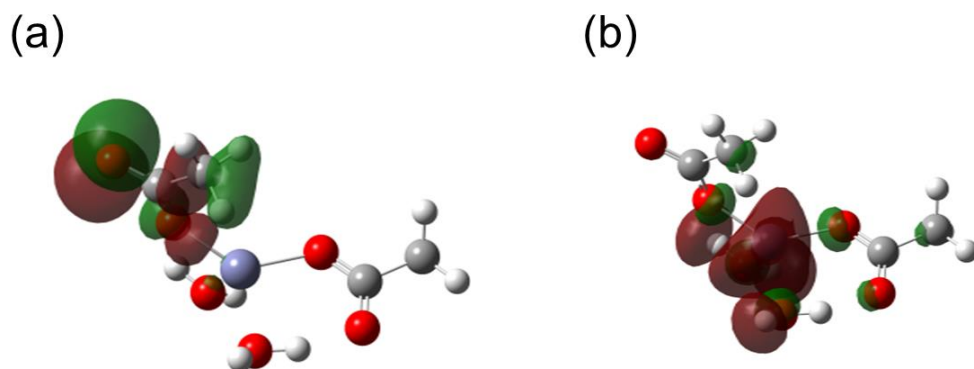

**Fig. S14** Plots of (a) HOMO and (b) LUMO of the  $\text{Zn}(\text{OAc})_2(\text{H}_2\text{O})_2$  complex, computed at the CPCM(UFF)/B3LYP/6-311+G(d,p) level of theory.

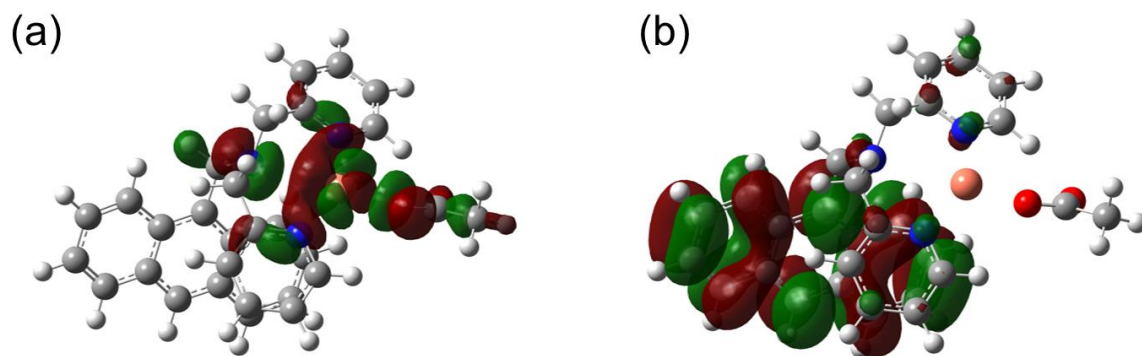

**Fig. S15** Plots of (a) HOMO and (b) LUMO of the Cu<sup>I</sup>(adpa)/(OAc<sup>-</sup>) complex, computed at the CPCM(UFF)/B3LYP/6-311+G(d,p) level of theory.

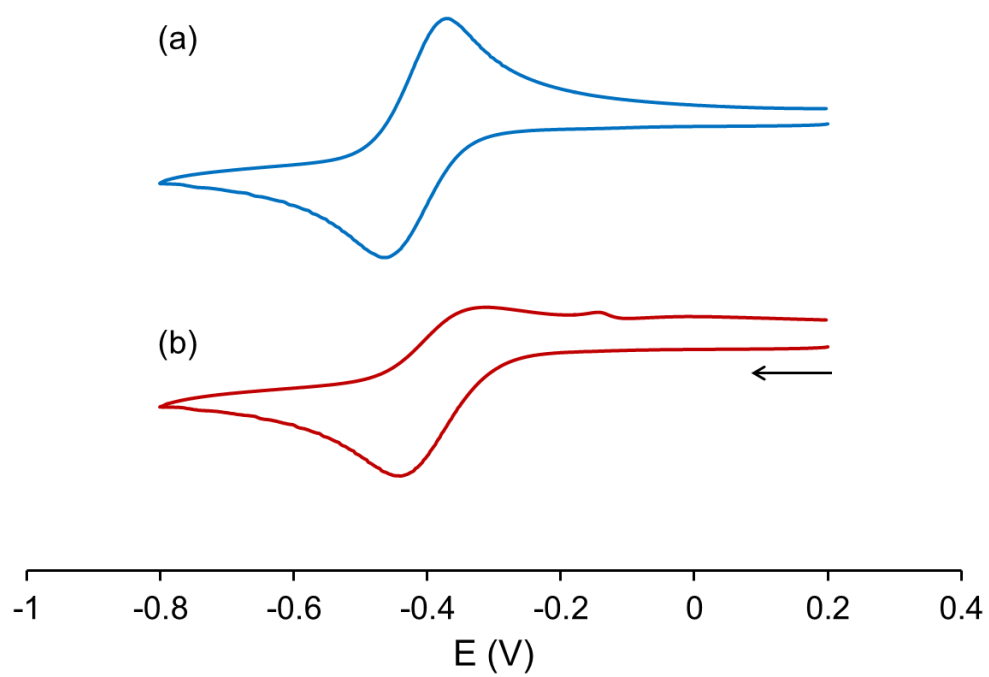

**Fig. S16** Cyclic voltammogram of (a)  $\text{Cu}^{\text{II}}(\text{adpa})$  (1.0 mM) and (b)  $\text{Cu}^{\text{II}}(\text{adpa})+\text{Zn}(\text{OAc})_2$  (8 mol equiv.) in  $\text{H}_2\text{O}/\text{CH}_3\text{CN}$  (7:3 v/v) with 0.1 M ABS buffer (pH 5.6) at scan rate = 100 mV/s.

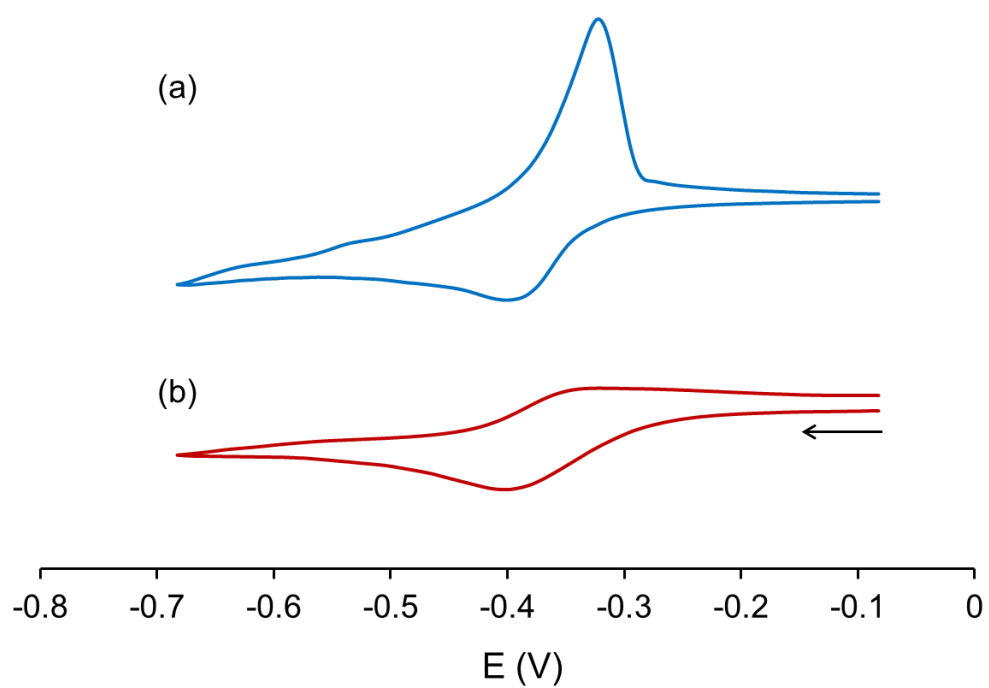

**Fig. S17** Cyclic voltammogram of (a)  $\text{Cu}^{\text{II}}(\text{adpa})$  (1.0 mM) and (b)  $\text{Cu}^{\text{II}}(\text{adpa})+\text{Zn}(\text{OAc})_2$  (8 mol equiv.) in  $\text{H}_2\text{O}/\text{CH}_3\text{CN}$  (7:3 v/v) with 0.1 M  $\text{KPF}_6$  at scan rate = 100 mV/s.



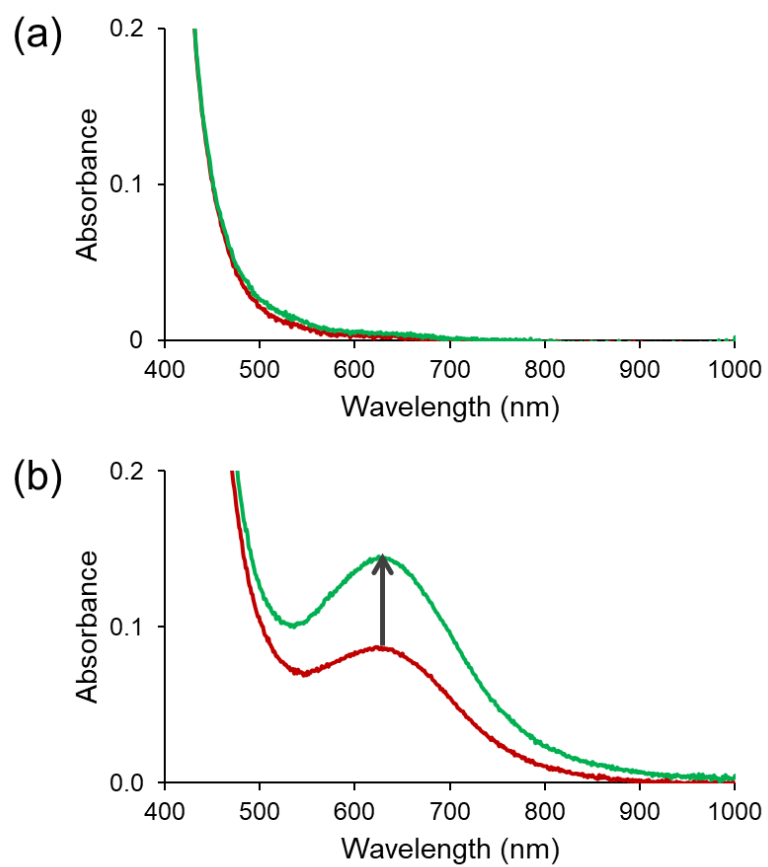

**Fig. S18** UV-vis spectral change at *d-d* band of Cu(adpa) with AsH<sub>2</sub> (1 mol equiv.) in H<sub>2</sub>O/CH<sub>3</sub>CN (7:3 v/v) buffered with ABS at pH 5.6 (a) in the presence and (b) absence of Zn(OAc)<sub>2</sub> at 2 min (—) and 20 min (—)

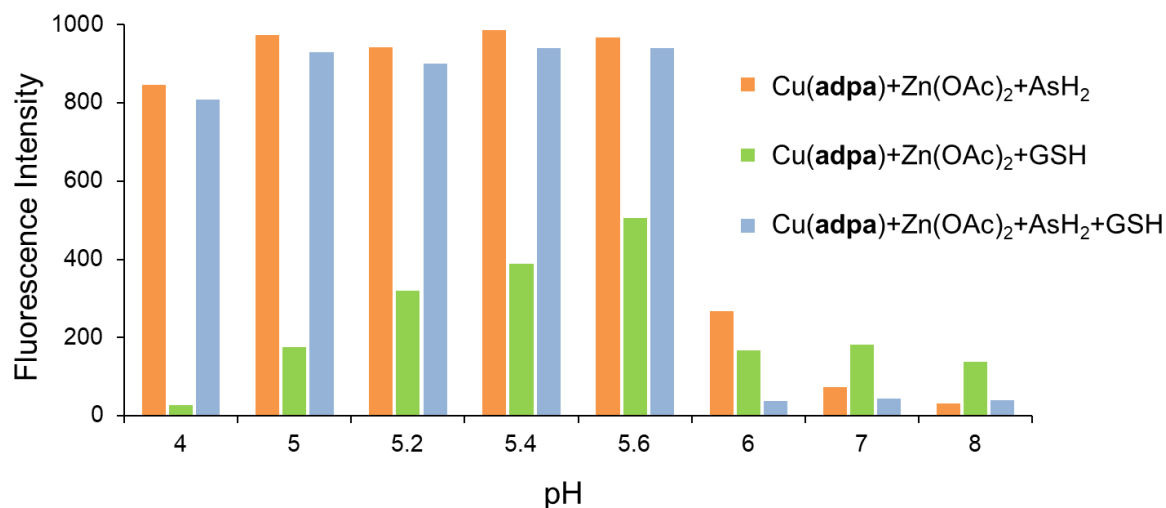

**Fig. S19** Fluorescence change of  $\text{Cu}^{\text{II}}(\text{adpa}) + \text{Zn}(\text{OAc})_2$  in the presence of (■)  $\text{AsH}_2$ , (■) glutathione (GSH) and (■)  $\text{AsH}_2 + \text{GSH}$  at different pH. The pH ranged from 4.0 - 5.6 was controlled by acetic-acetate buffer, whereas that from 6.0 - 8.0 was controlled by phosphate buffer. (Fluorescence parameters: excitation wavelength = 340 nm, slit setting on instrument = 10 and PMT = 500)

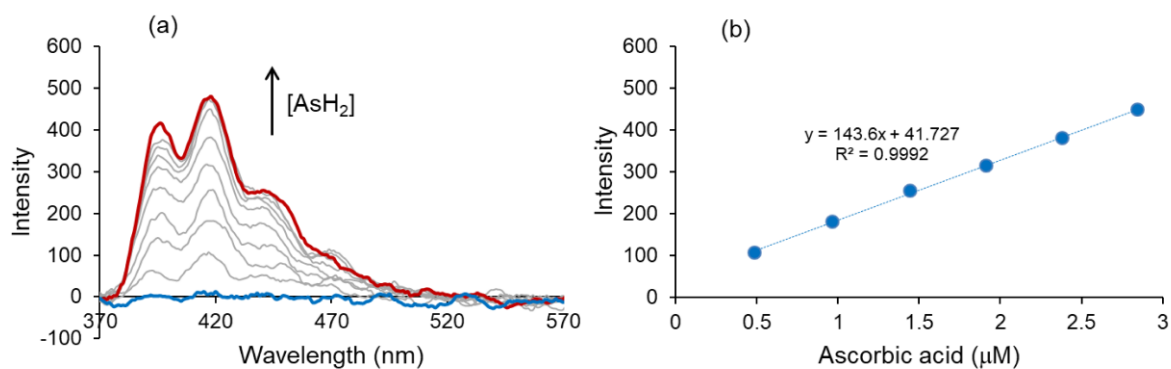

**Fig. S20** (a) Fluorescence titration of  $\text{Cu}^{\text{II}}(\text{atpa})$  ( $10 \mu\text{M}$ ) in the presence of  $\text{Zn}(\text{OAc})_2$  (40 mol equiv.) with  $\text{AsH}_2$  ( $0 - 4.21 \mu\text{M}$ ) and (b) plot between fluorescence intensity and concentration of ascorbic acid ( $\mu\text{M}$ ) (Fluorescence parameters: excitation wavelength = 340 nm, slit setting on instrument = 10 and PMT = 530)

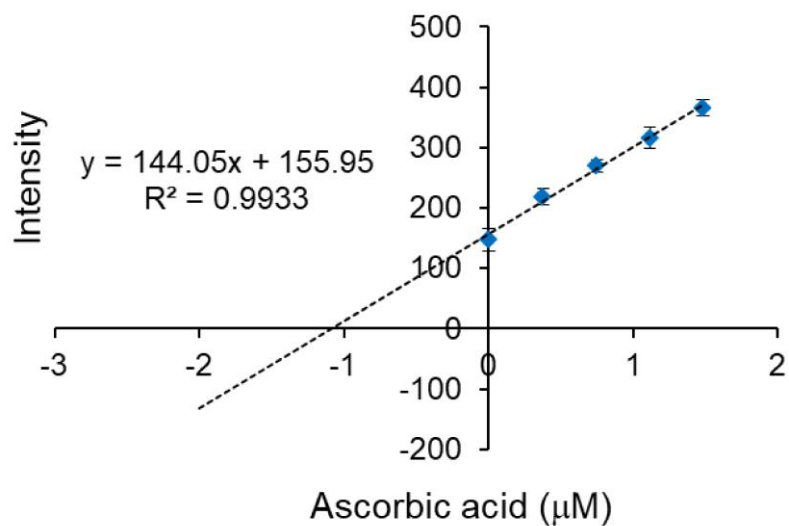

**Fig. S21** Standard addition curve for determination of ascorbic acid in vitamin C tablets (Fluorescence parameters: excitation wavelength = 340 nm, slit setting on instrument = 10 and PMT = 530)

|                   |                                 |                         |                                |
|-------------------|---------------------------------|-------------------------|--------------------------------|
| Data File:        | c:\star\data\31-01-61\20ul vitc | Operator (Calc):        | SUNAN                          |
| Channel:          | 1 = 210 nm RESULTS              | Calc Date:              | 01/31/2018 11:19:17            |
| Sample ID:        | 20ul VitC tablet                | Times Calculated:       | 4                              |
| Operator (Inj):   | SUNAN                           | Calculation Method:     | 20ul vitc tablet10;18;19-1.mth |
| Injection Date:   | 01/31/2018 10:18:19             | Instrument (Calc):      | Varian Star #1                 |
| Injection Method: | c:\star\vit c.mth               | Run Mode:               | Analysis                       |
| Run Time (min):   | 8.023                           | Peak Measurement:       | Peak Area                      |
| Workstation:      | DISK1                           | Calculation Type:       | Percent                        |
| Instrument (Inj): | Varian Star #1                  | Calibration Level:      | N/A                            |
|                   |                                 | Verification Tolerance: | N/A                            |

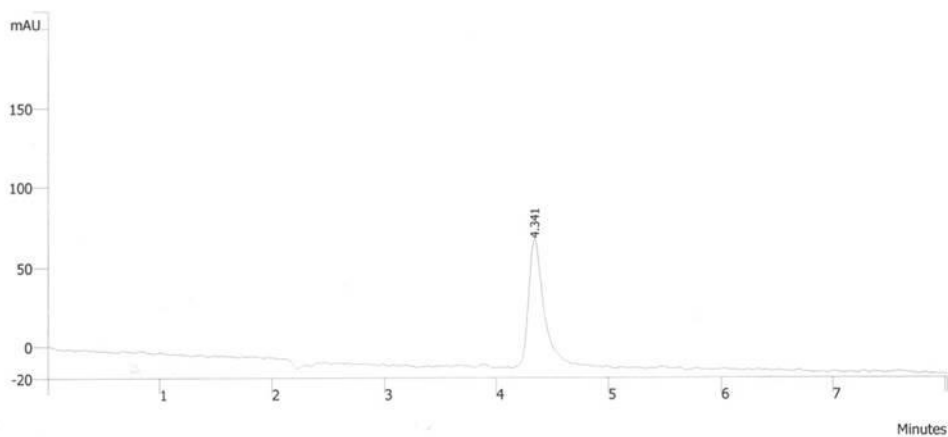

| Peak No       | Peak Name | Result (%area)  | Ret. Time (min) | Area (counts)  | Sep. Code |
|---------------|-----------|-----------------|-----------------|----------------|-----------|
| 1             |           | 100.0000        | 4.341           | 7440504        | BB        |
| <b>Totals</b> |           | <b>100.0000</b> |                 | <b>7440504</b> |           |

Status Codes:  
U - User defined peak endpoint(s)

**Fig. S22** Representative HPLC chromatogram of ascorbic acid analysis in vitamin C tablets

**Table S1** HPLC parameters for ascorbic acid detection in vitamin C tablets

| HPLC Conditions  |                                                 |
|------------------|-------------------------------------------------|
| Column           | C18, 5 $\mu$ m, 4.6 $\times$ 250 mm, Phenomenex |
| Mobile Phase     | 25 mM K-phosphate buffer; pH 2.4                |
| Flow Rate        | 1.5 mL/min                                      |
| Oven temperature | 30 $^{\circ}$ C                                 |
| UV Detection     | Wavelength; 210 nm                              |
| Injection Volume | 20 $\mu$ L                                      |

**Table S2** Determination of ascorbic acid in vitamin C tablets by our method using fluorescence spectroscopy

| Sample            | Taken ( $\mu\text{M}$ ) | Detected ( $\mu\text{M}$ ) | Recovery (%) | RSD (%) |
|-------------------|-------------------------|----------------------------|--------------|---------|
| Vitamin C tablets | 0                       | 1.083                      | -            | -       |
|                   | 0.636                   | 0.652                      | 102.4        | 3.82    |
|                   | 1.006                   | 1.037                      | 103.1        | 1.57    |
|                   | 1.372                   | 1.395                      | 101.7        | 3.90    |

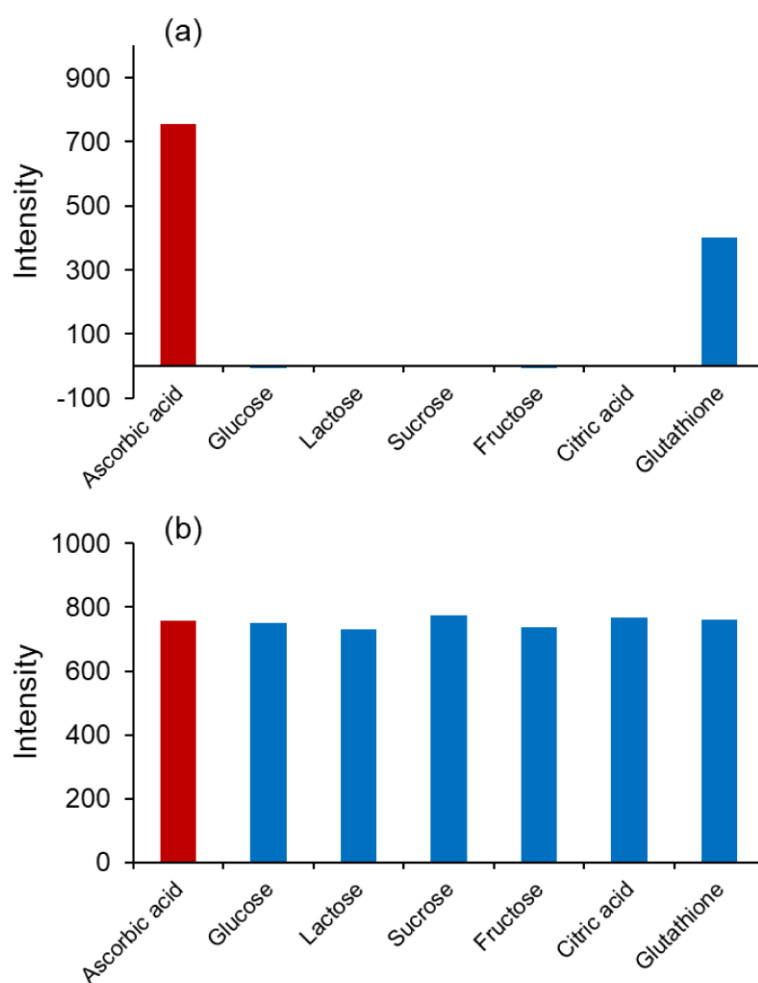

**Fig. S23** Fluorescence of  $\text{Cu}^{\text{II}}(\text{adpa}) + \text{Zn}(\text{OAc})_2$  in (a) the absence and (b) the presence of  $\text{AsH}_2$  with different natural reducing agents (5.0 mol equiv.); The concentration of  $\text{Cu}(\text{adpa}) = 10 \mu\text{M}$  and  $\text{Zn}(\text{OAc})_2 = 40 \text{ mol equiv.}$  (Fluorescence parameters: excitation wavelength = 340 nm, slit setting on instrument = 10 and PMT = 500)
